# Supplementary material
Source: PubMed Central journal article supplement (PMC3121388)
Supplement: supp_M111.244749_Suppfigs.pdf [file supp_M111.244749_Suppfigs.pdf]

## SUPPLEMENTAL MATERIAL

**Fig. S1:** Purification of C-terminal mCRYCtail and mBMAL1 fragments. SDS-PAGE analysis of purified C-terminal mCRY- and mBMAL1 fragments concentrated to about 5 mg/ml. All 4 proteins display aberrant running behaviours on SDS gels, but their correct mass and identity has been confirmed by mass spectrometry (data not shown).

**Fig. S2:** Analysis of mCRYCtail- and mBMAL1 fragments by analytical ultracentrifugation sedimentation velocity experiments. Representative figure showing sedimentation coefficient distributions  $c(s)$  obtained from the analysis of the sedimentation profiles of the monomeric mCRY1[471-606] (A) and mBMAL1[490-625] (B) proteins. Concentrations correspond to  $OD_{280} = 0.5$  (0.96 mg/ml for mCRY1[471-606]; 0.84 mg/ml for mBMAL1[490-625]). The  $c(s)$  distributions were normalized to facilitate the comparison.

**Fig. S3:** CD spectra of the mCRYCtail- and mBMAL1 fragments (A) and the synthetic mCRY peptides P1 and P2 (B). The mean molar ellipticity  $[\Theta]_R$  per amino acid residue after buffer correction is plotted against the wavelength. The spectra suggest, that the mBMAL1 and mCRY proteins are partially disordered (Table 2). Peptide P1 has a high  $\alpha$ -helical content, whereas peptide P2 is largely unstructured.

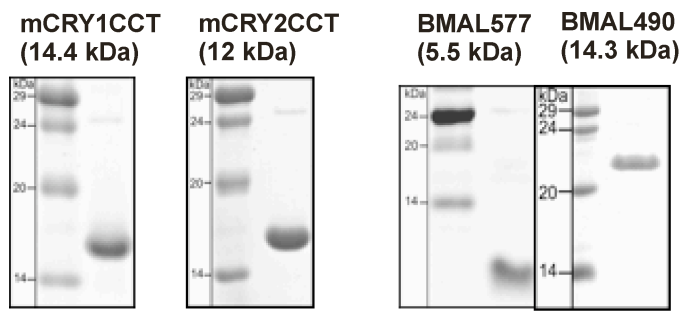

Fig. S1

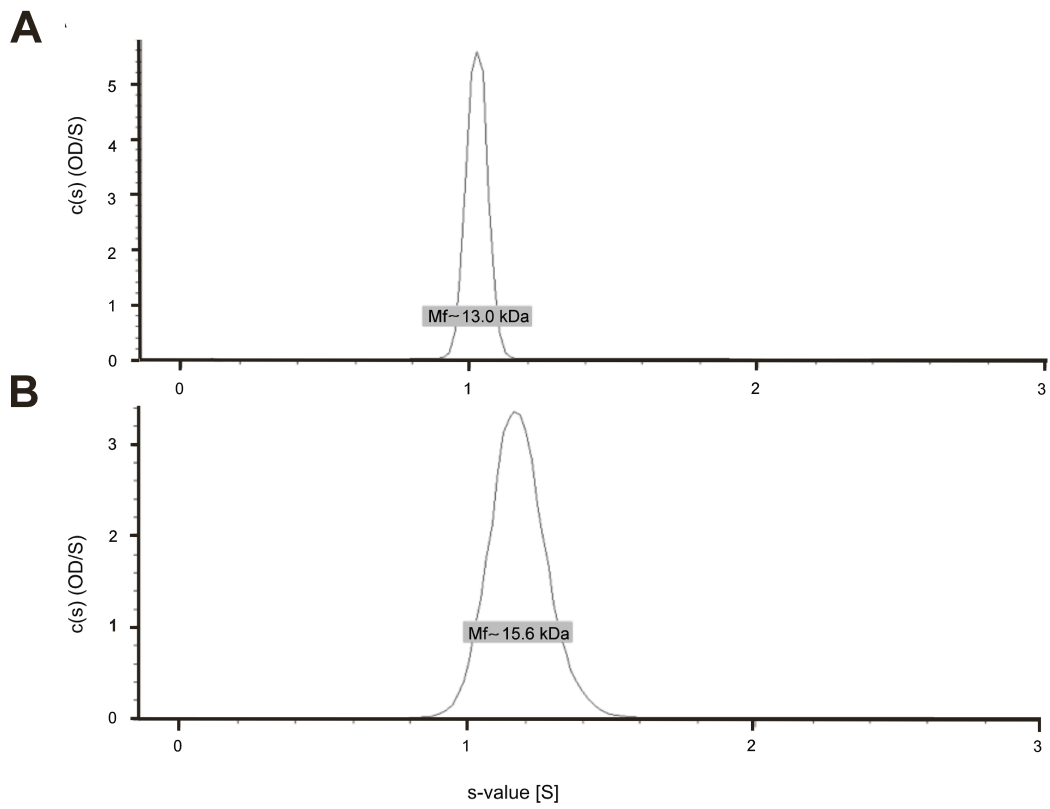

Fig. S2

**A**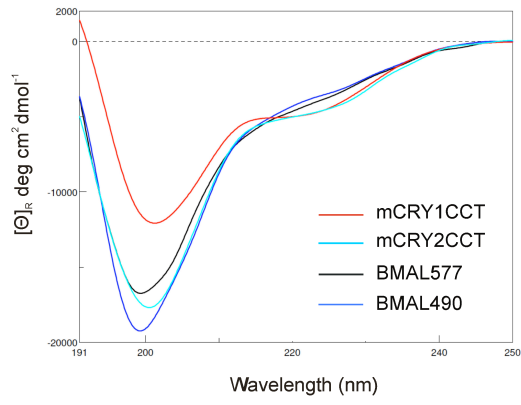**B**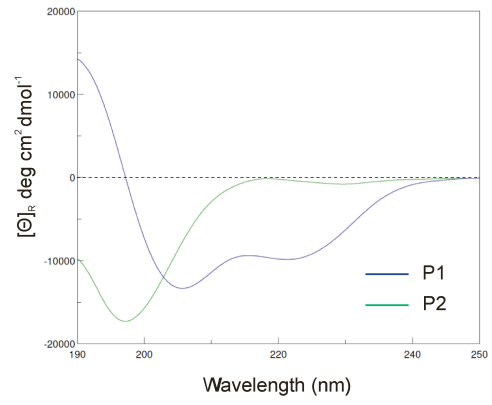

Fig. S3
